1 **BIOMARKERS OF CARDIOVASCULAR TOXICITY OF BENZENE INHALATION IN MICE**

2  
3  
4 Marina V. Malovichko<sup>1,4</sup>, Wesley T. Abplanalp<sup>1,4</sup>, Samantha A. McFall<sup>1,3,4</sup>, Breandon S. Taylor<sup>1,3,4</sup>,  
5 Nalinie S. Wickramasinghe<sup>1,4</sup>, Israel D. Sithu<sup>1,4</sup>, Igor N. Zelko<sup>1,4</sup>, Shizuka Uchida<sup>1,3,4</sup>, Saurin R.  
6 Sutaria<sup>1,5</sup>, Michael H. Nantz<sup>1,5</sup>, Aruni Bhatnagar<sup>1,4</sup>, Daniel J. Conklin<sup>1,4</sup>, Timothy E. O'Toole<sup>1,4</sup> and  
7 Sanjay Srivastava<sup>1,4</sup>

8  
9 <sup>1</sup>University of Louisville Superfund Research Center; <sup>2</sup>American Heart Association-Tobacco  
10 Center of Regulatory Science; <sup>3</sup>Envirome Institute; <sup>4</sup>Department of Medicine, Division of  
11 Environmental Medicine; and <sup>5</sup>Department of Chemistry, University of Louisville, Louisville, KY  
12 40202

13  
14 Conflict of interest statement: The authors have declared that no conflict of interest exists  
15  
16

17  
18  
19  
20  
21 Address correspondence to: Sanjay Srivastava, PhD  
22 Superfund Research Center,  
23 Room 306 CII Building  
24 302 E. Muhammad Ali Blvd  
25 Louisville, KY 40202  
26 Phone: 502-852-5724  
27 Fax: 502-852-5834  
28 E-mail: [sanjay@louisville.edu](mailto:sanjay@louisville.edu)

32 **ABSTRACT**

33

34 Benzene is a ubiquitous environmental pollutant. Recent population-based studies suggest that  
35 benzene exposure is associated with an increased risk for cardiovascular disease. However, it is  
36 unclear whether benzene exposure is sufficient to induce cardiovascular toxicity. We examined  
37 the effects of benzene inhalation (50 ppm, 6 h/day, 5 days/week, 6 weeks) or HEPA-filtered air  
38 exposure on the biomarkers of cardiovascular toxicity in male C57BL/6J mice. Benzene inhalation  
39 significantly increased the biomarkers of endothelial activation and injury including endothelial  
40 microparticles, activated endothelial microparticles, endothelial progenitor cell microparticles,  
41 lung endothelial microparticles, and activated lung and endothelial microparticles while having no  
42 effect on circulating levels of endothelial adhesion molecules, endothelial selectins, and  
43 biomarkers of angiogenesis. To understand how benzene may induce endothelial injury, we  
44 exposed human aortic endothelial cells to benzene metabolites. Of metabolites tested,  
45 *trans,trans*-mucondialdehyde (10  $\mu$ M, 18h) was most toxic. It induced caspases-3, -7 and -9  
46 (intrinsic pathway) activation, and enhanced microparticle formation by 2.4-fold. Levels of platelet-  
47 leukocyte aggregates, platelet macroparticles, and proportion of CD4<sup>+</sup> and CD8<sup>+</sup> T-cells were also  
48 significantly elevated in the blood of the benzene-exposed mice. We also found that benzene  
49 exposure increased the transcription of genes associated with endothelial cell and platelet  
50 activation in the liver; and induced inflammatory genes and suppressed cytochrome P450s in the  
51 lungs and the liver. Together, these data suggest that benzene exposure induces endothelial  
52 injury, enhances platelet activation and inflammatory processes; and circulatory levels of  
53 endothelial cell and platelet-derived microparticles and platelet-leukocyte aggregates are  
54 excellent biomarkers of cardiovascular toxicity of benzene.

55

56 **Keywords:** Benzene, endothelial cells, platelets, microparticles, inflammation

57

58

59

60

61

62

## 63 INTRODUCTION

64 Environmental pollution accounts for 9 million pre-mature deaths worldwide, and two-third of  
65 these deaths are attributed to air pollution (1). Benzene, a volatile organic compound (VOC), is  
66 abundant both in outdoor and indoor air. Ranked number sixth on the Agency for Toxic  
67 Substances and Disease Registry (ATSDR) priority list, benzene is one of the top twenty  
68 chemicals generated by industrial sources in the United States. It is used to produce industrial  
69 chemicals, rubbers, dyes, lubricants, detergents, etc. (2). The United States Occupational Safety  
70 and Health Administration has set the occupational benzene exposure limit of 1 ppm (3), however,  
71 benzene exposure in excess of 100 ppm is still prevalent in the developing countries (4). High  
72 levels of benzene (>50 ppm) are also generated by tobacco products such as water pipes, cigars,  
73 pipe tobacco, and cigarettes (5, 6). Petroleum products and automobile exhaust also contain  
74 copious amount of benzene, especially near the emission source (7-9). Indoor sources of  
75 benzene include vapor or gases released by benzene containing products such as paints,  
76 furniture wax, and detergents (2). The atmospheric benzene exposure is likely to be higher in  
77 people living near gasoline refineries, petrochemical industries, gasoline fueling stations, and  
78 Superfund and other hazardous waste sites.

79  
80 Excessive rates of type 2 diabetes and stroke have been found in an evaluation of 720,000  
81 individuals living within a half-mile of 258 Superfund sites that were associated with excessive  
82 VOC (such as benzene and trichloroethylene) exposure (10). We observed that environmental  
83 benzene exposure is associated with increased CVD risk scores and augmented levels of sub-  
84 clinical markers of cardiovascular disease (11-14). Others have shown that benzene exposure  
85 increases the risk for arterial hypertension (15, 16), rhythm abnormalities (15), and heart  
86 failure(17). An assessment of excessive amount of VOC exposure and cardiovascular disease  
87 (CVD) mortality shows that in a single-pollutant model, benzene, propylene, and xylene are all  
88 significantly associated with CVD mortality (18). In a cohort study of intra-urban variation in VOCs

89 and mortality, similar associations were found between CVD mortality and exposure to benzene,  
90 hexane, and total hydrocarbon (19). However, it is unclear whether benzene exposure is sufficient  
91 to cause cardiovascular disease or injury. Therefore, using a well-controlled mouse model, we  
92 systematically examined the effect of inhaled benzene exposure on biomarkers of cardiovascular  
93 toxicity.

94

## 95 **MATERIALS AND METHODS**

96

97 ***Murine Benzene Exposure:*** Seven-week-old male C57BL6/J mice were obtained from Jackson  
98 laboratories, Bar Harbor, ME. Mice were treated according to American Physiological Society  
99 *Guiding Principles in the Care and Use of Animals*, and all protocols were approved by University  
100 of Louisville Institutional Animal Care and Use Committee. Mice (n=24/group) were housed under  
101 pathogen-free conditions in the University of Louisville vivarium under controlled temperature and  
102 12h light/12h dark cycle. Mice were maintained on a standard chow diet (Rodent Diet 5010,  
103 LabDiet, St. Louis, MO) containing 4.5% fat by weight). Starting at eight weeks of age mice were  
104 exposed to 50 ppm benzene (6 h/day, 5days/week) for 6 weeks as described before(20, 21). Mice  
105 exposed to HEPA-filtered air only served as a control. To examine the effect of benzene exposure  
106 on the susceptibility to inflammation, a sub-set of benzene and air-exposed mice (n=24/group)  
107 were treated with 0.5 mg/kg lipopolysaccharides (LPS, Sigma Cat# 2630, Lot# 028M4022V; i.p).  
108 At the end of the exposure protocol, mice were euthanized with sodium pentobarbital (150 mg/kg  
109 body weight; i.p.) and blood and tissues were harvested.

110

111 ***RNA-seq analysis:*** One  $\mu$ g of DNase-I-treated total RNA, isolated from the liver and lung  
112 tissues, was used for the cDNA library construction for poly-A RNA-seq at Novogene,  
113 Sacramento, CA using NEBNext Ultra II RNA Library Prep Kit for Illumina (New England BioLabs,  
114 #E7775) according to manufacturer's protocol. After a series of terminal repair, poly-adenylation,

115 and sequencing adaptor ligation, the double-stranded cDNA library was completed following size  
116 selection and PCR enrichment. The resulting 250-350 bp insert libraries were quantified using a  
117 Qubit 2.0 fluorometer (Thermo Fisher Scientific) and quantitative PCR. The size distribution was  
118 analyzed using an Agilent 2100 Bioanalyzer. Qualified libraries were sequenced on an Illumina  
119 Novaseq 6000 system using a paired-end 150 run (2×150 bases). A minimum of 20 million raw  
120 reads were generated from each library. The RNA-seq data generated in this study were  
121 deposited in the Gene Expression Omnibus (GSE).

122

123 For data analysis, FASTQ files were trimmed using fastp(22) (version 0.20.0) and the following  
124 parameters: `--cut_by_quality5 --cut_by_quality3 --detect_adapter_for_pe --`  
125 `overrepresentation_analysis --correction --trim_front1 7 --trim_front2 7`. The alignment to the  
126 mouse genome (GRCm38.90) was performed using STAR(23) (version 020201) and the following  
127 parameters: `--runMode alignReads --runThreadN 8 --outSAMstrandField intronMotif --`  
128 `outSAMmode Full --outSAMattributes All --outSAMattrRGline --outSAMtype BAM`  
129 `SortedByCoordinate --limitBAMsortRAM 45000000000 --quantMode GeneCounts --`  
130 `outReadsUnmapped Fastx -outSAMunmapped within`. Differential expression analysis was  
131 performed using edgeR(24) (version 3.10). The RLE (relative log expression) method was used  
132 to normalize the data. Gene ontology analysis was performed with the DAVID Bioinformatics  
133 Resources 6.8 (25). A Venn diagram was drawn using Bioinformatics & Evolutionary Genomics  
134 website (26). Heatmaps were created with Multiple Experiment Viewer (MEV) (27).

135

136 ***Bone marrow derived stem cells:*** Bone marrow cells were isolated from the femur and tibia and  
137 separated by Ficoll gradient. The cells were washed twice with PBS containing 1% BSA  
138 (PBS/BSA) and incubated with Fc Block (CD32/CD16) anti-mouse antibody for 10 minutes at 4°C  
139 to prevent non-specific binding. Samples were incubated (30 min, 4°C) with antibody cocktails  
140 containing Lineage-Pacific Blue, ckit-APC-Cy7, Sca-FITC, and CD34-Alexa Fluor 700 antibodies,

141 and analyzed on an LSR II flow cytometer for 90 seconds on high speed. Cell populations were  
142 gated using the FlowJo software and normalized to the total number of cells.

143

144 **Microparticles:** Microparticles in the peripheral blood were measured as described before (28,  
145 29) with slight modifications. Briefly, plasma was centrifuged for 2 min (11,000 $g$  at 4°C) to  
146 remove residual cells and debris, and the supernatant was aspirated and centrifuged for 45 min  
147 (17,000 $g$  at 4°C). The resulting microparticle pellet was resuspended in Annexin V Buffer pre-  
148 filtered through 0.22 $\mu$ m syringe filter and incubated with the anti-mouse FcBlock (CD32/CD16)  
149 for 10 minutes. Endothelial microparticles were stained with the antibody cocktail containing  
150 Annexin V-Pacific Blue, Flk-APC, Sca-PECy7, CD62E-PE and CD143-FITC for 30 min. Platelet  
151 microparticles were stained in a separate tube with Annexin V-Pacific Blue and platelet CD41-  
152 FITC antibody. Identical samples with no antibodies were utilized as controls for the gating.  
153 Counting beads, added to individual samples were used for data normalization. Samples were  
154 analyzed on BD LSR II flow cytometer for 5 min at low speed. Microparticle numbers were  
155 quantified in gated populations <1 $\mu$ m in size and positive for Annexin V staining using the FlowJo  
156 software. Microparticle subpopulations were further identified based on expression of various  
157 surface markers.

158

159 To examine the effect of benzene metabolites on endothelial cell apoptosis and microparticles  
160 formation *in vitro*, human aortic endothelial cells (HAEC) were incubated with hydroquinone - HQ,  
161 Catechol - Cat, and MA (10  $\mu$ M each) for 18h, and the apoptosis was examined by western blotting  
162 using anti-cleaved-caspase-3, -cleaved caspase-7, -cleaved caspase-8, and cleaved caspase-9  
163 antibody (Cell Signaling Technology, Danvers, MA). The microparticles (<1 $\mu$ m, Annexin V<sup>+</sup>)  
164 released in the cell culture medium were analyzed by flow cytometry.

165

166 **Synthesis of *trans,trans*-Mucondialdehyde:** *trans,trans*-Mucondialdehyde (MA) was prepared  
167 from muconic acid (Sigma-Aldrich, St. Louis, MO) by a recently developed one-pot acid-to-  
168 aldehyde reduction protocol (30)

169

170 **Markers of endothelial function and inflammation:** Levels of soluble adhesion molecules,  
171 markers of angiogenesis, and cytokines and chemokine in the plasma were measured by  
172 multiplex arrays at Eve Technologies (Calgary, Alberta, Canada).

173

174 **Immune cells:** Circulating immune cells were analyzed by flow cytometry as described before  
175 (28, 31). Briefly, lysed whole blood was centrifuged and washed twice with PBS containing 1%  
176 BSA (PBS/BSA). The cell pellets were re-suspended in the same buffer and incubated with  
177 CD32/CD16 for 10 min at 4°C to prevent unspecific binding. The cells were then incubated with  
178 an antibody cocktail consisting of FITC-anti-Nk1.1, PE-anti-Ly6C, PerCPe710-anti-CD8, PECy7-  
179 anti-CD62, APC-anti-CD19, Alexa 700-antiGr-1, APCe780-anti-CD3, eVolve605-CD11b, and  
180 e650-anti-CD4. After 30 min on ice, the cells were washed, re-suspended in PBS/BSA, and  
181 analyzed on an LSR II flow cytometer for 90 sec on high speed. Cell numbers were analyzed  
182 using the FlowJo software and normalized to the total leukocyte numbers.

183

184 **Platelet-leukocyte aggregates.** Platelet-leukocyte aggregates were identified by flow cytometry  
185 and quantified as events double positive for CD41 (platelets) and CD 45 (leukocytes) as described  
186 before(28).

187

188 **Statistics:** Data are expressed as mean  $\pm$  standard error of mean (SEM). Statistical significance  
189 was accepted at  $P < 0.05$  level. Student's two-tailed *t* test with unequal variance was used to  
190 compare the data sets.

191 **RESULTS**

192

193 **Inhaled benzene exposure and endothelial microparticles formation:** The endothelium is a  
194 critical regulator of vascular homeostasis, vascular tone, angiogenesis, and thrombosis. Our  
195 recent studies demonstrate that exposure to benzene depletes circulating endothelial progenitor  
196 cells (EPCs, also known as circulating angiogenic cells) in human and mice (11, 14). Mobilization  
197 of EPCs from the bone marrow and their homing to the injury sites can be affected by exogenic  
198 factors such as aging, disease, and an unhealthy lifestyle (32-36), and therefore changes in EPC  
199 levels are reflective of endothelial health. A decrease in the levels of blood EPCs reflects  
200 endothelial injury and impaired repair. To assess the benzene exposure-induced endothelial  
201 toxicity, we measured circulating endothelial microparticles. Endothelial microparticles, 0.1-1.0  
202  $\mu\text{m}$  vesicles shed from activated or injured cells, are surrogate markers of endothelial activation  
203 and injury and comprise 5-15% of microparticles in the blood. Circulating endothelial  
204 microparticles are positively associated with coronary artery disease and stroke (37, 38). We  
205 observed that inhaled benzene exposure significantly increases the levels of circulating  
206 endothelial microparticles ( $<1\mu\text{m}$ ; Annexin V<sup>+</sup>/CD41<sup>+</sup>/Flk<sup>+</sup>), activated endothelial microparticles  
207 ( $<1\mu\text{m}$ ; Annexin V<sup>+</sup>/CD41<sup>+</sup>/CD62E<sup>+</sup> [E-selectin]), EPC-derived microparticles ( $<1\mu\text{m}$ ; Annexin  
208 V<sup>+</sup>/CD41<sup>+</sup>/Flk<sup>+</sup>/Sca<sup>+</sup>), lung endothelial microparticles ( $<1\mu\text{m}$ ; Annexin V<sup>+</sup>/CD143<sup>+</sup>), and activated  
209 lung endothelial microparticles ( $<1\mu\text{m}$ ; Annexin V<sup>+</sup>/CD143<sup>+</sup>/CD62E<sup>+</sup>) by 1.8-3.8-fold (**Fig. 1**). To  
210 assess the effect of inhaled benzene exposure on endothelial activation we measured the  
211 circulating levels of soluble adhesion molecules. Our data showed that benzene exposure  
212 modestly decreased the levels of soluble intra cellular adhesion molecule-1 (sICAM-1;  
213 **Supplemental Table 1**), whereas other soluble adhesion molecules – platelet endothelial cell  
214 adhesion molecule-1 (sPECAM-1), endothelial selectin (sE-selectin), and platelet selectin (sP-  
215 selectin) were comparable with air-exposed controls. Together these data suggest that inhaled  
216 benzene exposure does not induce endothelial activation and most of the endothelial



217 microparticles are derived from benzene-induced endothelial injury. Since benzene inhalation  
218 also depletes circulating angiogenic cells mice (11, 14), we also quantified circulating  
219 angiogenesis markers. However, our data show that levels of angiogenesis markers in benzene-  
220 exposed mice are comparable to the air-exposed controls (**Supplemental Table 1**).

221

222 Because toxicity of benzene is mediated by its metabolism to reactive metabolites, next we  
223 directly examined the effect of benzene metabolites hydroquinone, catechol, and MA on HAEC  
224 apoptosis. As shown in **Fig. 2**, hydroquinone and catechol only modestly increased the activation  
225 of the pan apoptosis marker caspase-7 in HAEC, whereas MA profoundly increased caspase-7  
226 cleavage. MA also robustly increased caspase-3 activation, suggesting that it is the most toxic  
227 benzene metabolite for endothelial cells. To examine the mechanisms by which MA exerts its  
228 toxicity, we measured the activation of caspase-8 and caspase-9. As shown in **Fig. 2**, MA had no  
229 effect on caspase-8, but robustly activated caspase-9. Together, these data suggest that MA  
230 doesn't affect the extrinsic pathway of apoptosis, but selectively activates the intrinsic pathway.

231

232 **Inhaled benzene exposure and hematopoietic progenitor cells:** Benzene is a well-known  
233 hematopoietic toxin (39). Metabolites of benzene such as hydroquinone, catechol, and MA can  
234 diffuse from their sites of generation and exert the toxicity at distal sites. We observed that under  
235 our experimental conditions, benzene exposure did not affect the levels of common myeloid  
236 progenitor (CMPC) and multipotent progenitor cells (MPC) in the bone marrow but significantly  
237 decreased the levels of hematopoietic progenitor cells (HPC; **Fig. 3**). Because the vascular niche  
238 of HPC is critical for hematopoiesis and endothelial cell materialization, benzene-inhalation-  
239 induced depletion of HPC could affect EPC formation in the bone marrow and compromise  
240 endothelial repair.

241

242 **Inhaled benzene exposure and platelet activation:** The surface of quiescent endothelial cells  
243 (luminal surface) which face the blood is normally anti-adhesive. However, injury to the endothelial  
244 cells promotes platelet adhesion for repair. We observed that inhaled benzene exposure  
245 augments platelet-leukocyte aggregate formation by 3-fold (**Fig. 4**). This was accompanied by  
246 1.6-fold increase in circulating levels of platelet microparticles in benzene-exposed mice.  
247 Together these data suggest that benzene exposure enhances platelet activation and platelet-  
248 derived microparticles could serve as a biomarker of pro-thrombotic response of inhaled benzene.  
249

250 **Inhaled benzene exposure and inflammatory markers:** In humans, polymorphism of cytokines  
251 and endothelial activation markers increases the susceptibility to benzene-induced hematopoietic  
252 toxicity (40). We have recently shown that in addition to depleting circulating EPCs, benzene  
253 inhalation also suppresses the levels of leukocytes, lymphocytes, monocytes, and neutrophils in  
254 the peripheral blood in mice (11). However, our flow cytometric analysis of T-lymphocytes shows  
255 that inhaled benzene exposure modestly increases the circulating levels of CD3<sup>+</sup>, CD4<sup>+</sup> and CD8<sup>+</sup>  
256 T-cells (**Fig 5**). Blood CD19<sup>+</sup> B cells, NK1.1<sup>+</sup> natural killer cells, Gr1<sup>+</sup> granulocytes and Ly6C<sup>+</sup>  
257 monocytes (**Fig. 5**) in benzene-exposed mice were comparable to the corresponding air-exposed  
258 controls. Quantitation of plasma cytokines showed that IL-6 levels were significantly lower in  
259 benzene-exposed mice. All the other circulating cytokines in the benzene-exposed mice were  
260 comparable with the air-exposed controls (**Supplemental Table 1**). Stimulation with low dose  
261 LPS, 18h before euthanasia, significantly increased the levels of cytokines and chemokines such  
262 as GM-CSF, IL-6, IL-10, KC, MCP-1 etc. in the peripheral blood. However, benzene exposure did  
263 not affect the LPS-induced cytokine formation.

264

265 **Inhaled benzene exposure and pulmonary and hepatic metabolism:** While benzene is  
266 primarily metabolized in the liver, lungs are the first target of inhaled benzene. We, therefore,  
267 examined gene transcription in the liver and the lungs of benzene exposed mice. Although six

268 weeks of benzene exposure did not affect the expression of CYP2E1, which plays a pivotal role  
269 in benzene metabolism, benzene exposure significantly down-regulated 185 genes in the lungs  
270 and 29 genes in the liver, whereas transcription of 301 genes was increased in the lungs and 43  
271 genes in the liver (>1.5-fold and  $P < 0.05$ , **Fig 6**). The Heat map of genes associated with  
272 cardiometabolic toxicity showed the suppression of cytochrome P450s and up-regulation of  
273 inflammatory genes in the lungs and the liver, increased transcription of glycolysis associated  
274 genes in the lungs, and induction of the transcription of genes associated with oxidative stress,  
275 endothelial activation, and platelet activation in the liver (**Fig. 6**). Gene ontology analysis showed  
276 strong association with the lipid metabolic process, cardiac contractility genes, and keratinization  
277 in the lungs, and activation of NF- $\kappa$ B, inflammatory response, leukocyte cell-cell adhesion and  
278 apoptosis in the liver (**Fig. 6**). These observations are consistent with benzene-induced  
279 endothelial apoptosis and our recent studies demonstrating that the benzene-induced insulin  
280 resistance is mediated by NF- $\kappa$ B activation, inflammatory signaling, and oxidative stress in the  
281 liver (12).

282

283

## 284 **DISCUSSION**

285

286 The major findings of this study are that benzene exposure induces endothelial injury and  
287 augments platelet activation, as assessed by a panel of blood endothelial cell and platelet  
288 microparticles and platelet-leukocyte adduct formation. This was accompanied by the differential  
289 regulation of genes associated with xenobiotic metabolism, endothelial function, platelet  
290 activation, and inflammatory signaling associated genes in the liver and the lung, suppression of  
291 hematopoietic progenitor cells in the bone marrow, and increase in the levels of T-cells in the  
292 peripheral blood.

293

294 Although little is known about the direct effect of VOCs such as benzene on vascular injury and  
295 thrombosis, the endothelium has been shown to be particularly vulnerable to the effects of  
296 tobacco smoke which contains high levels of benzene and other VOCs. In smokers, endothelial  
297 dysfunction is the most primitive sign of injury and precedes morphological changes in the vessel  
298 wall (41). A dysfunctional endothelium affects vascular homeostasis, blood pressure regulation,  
299 thrombosis, atherogenesis, plaque stability, and cardiac functions (42, 43). To examine the effect  
300 of benzene exposure on endothelial changes, we measured the levels of microparticles that are  
301 released from activated or apoptotic endothelial cells (44) and are a sensitive index of vascular  
302 injury (45, 46). Increased levels of circulating endothelial microparticles correlate with endothelial  
303 dysfunction in patients with coronary artery disease (36), end stage renal failure (47), obesity (48),  
304 and type-2 diabetes (37). Augmented activated endothelial microparticles in the blood are  
305 associated with cardiovascular events (49), and enhanced plasma lung endothelial microparticle  
306 levels in healthy smokers precede changes in pulmonary function (50). Our data demonstrating  
307 that benzene exposure increases the circulating levels of endothelial microparticles, activated  
308 endothelial microparticles, EPC microparticles, lung endothelial microparticles and activated lung  
309 endothelial microparticles, suggest that these microparticles are sensitive and robust surrogate  
310 markers of benzene-induced endothelial injury.

311

312 Increased circulating endothelial microparticles have also been observed in humans following  
313 episodic fine particulate matter exposure (29). Nonetheless, unlike murine exposure to benzene,  
314 fine particulate matter exposure in humans did not increase blood activated endothelial  
315 microparticles, suggesting that activated endothelial cells are more sensitive to benzene exposure  
316 than fine particulate matter.

317

318 Endothelial microparticles contain Von Willebrand factor and factor VIII which promote platelet  
319 activation (51, 52). Therefore, the observed increase in platelet-leukocyte adduct formation in

320 benzene-exposed mice could be secondary to benzene-induced endothelial injury and  
321 microparticle formation. Moreover, hypercholesterolemia following benzene exposure (11) could  
322 also augment platelet activation. Induction of thromboxane A synthase 1 (Tbxas1) in the liver of  
323 benzene-exposed mice also corroborates hyper platelet activation, whereas hepatic induction of  
324 guanylate cyclase soluble subunit  $\beta$ -1 (Gucyb1), the receptor of nitric oxide, could reflect an  
325 adaptive response to benzene exposure-induced platelet activation.

326

327 MA-induced endothelial cell apoptosis and endothelial microparticle formation suggest that the  
328 observed toxicity of benzene is likely to be mediated by its reactive metabolites. Hepatic induction  
329 of the orphan nuclear receptor Nr4a1 (Nurr77), a molecular regulator of apoptosis and  
330 inflammation (53-59), in benzene-exposed mice further support that benzene exposure affects  
331 apoptotic and inflammatory processes. Although the contribution of benzene-induced Nr4a1  
332 transcription in endothelial toxicity is unknown, Nr4a1 has been suggested to prevent TNF $\alpha$  and  
333 IL-1 $\beta$ -induced endothelial activation (60), and endothelial deficiency of Nr4a1 suppresses oxLDL-  
334 induced apoptosis (57). Unlike Nr4a1, benzene exposure suppressed the hepatic expression of  
335 Snai2, a transcription factor involved in the endothelial to mesenchymal transition and implicated  
336 in pathological angiogenesis and atherosclerosis (61, 62). Further studies are required to examine  
337 the contribution of Snai2 in benzene-induced endothelial toxicity.

338

339 Benzene-induced increase in the expression of Thromboxane A synthase 1 (Tbxas1) in the liver  
340 corroborate benzene-induced platelet activation. Because thromboxanes play a critical role in  
341 modulating vasoconstriction and platelet aggregation, increased formation of thromboxanes can  
342 disrupt vascular homeostasis and promote thrombotic vascular events. Increased hepatic  
343 transcription of guanylate cyclase 1 soluble subunit beta 1 (Gucy1b1) could and guanylate cyclase  
344 1 soluble subunit beta 1 (Gucy1b1), the receptor for nitric oxide, could be an adaptive response to  
345 mitigate benzene-induced pro-thrombotic responses. However, additional studies are required to

346 examine which cells in the liver induce Tbxas1 and Gucy1b1 and how do these proteins affect  
347 benzene-induced vascular homeostasis and thrombosis. Likewise, additional studies are also  
348 required to examine the contribution of benzene inhalation-induced transcription of an array of  
349 inflammatory genes in the lungs and the liver on endothelial toxicity and platelet activation.

350

351 Together, these studies suggest that inhaled benzene exposure induces endothelial injury and  
352 affects platelet activation and inflammatory processes. Because benzene is a pervasive and  
353 abundant air pollutant, decreasing its exposure can significantly reduce air pollution-induced  
354 cardiovascular disease.

355

356 **Funding:** This study was supported in parts by NIH grants P42 ES023716, R01 HL149351, R01  
357 HL137229, R01 HL146134, R01 HL156362, R01 HL138992, R01 ES029846, R21 ES033323,  
358 U54 HL120163, and the Jewish Heritage Foundation grant OGMN190574L.

359

360

361

362

363

364

365

366

367

368

369

370

371 **FIGURE LEGENDS:**

372 Figure 1: *Benzene exposure increases circulating endothelial microparticles in mice.* Abundance  
373 of endothelial microparticles (EMP; <1 $\mu$ m, AnnexinV<sup>+</sup>/Flk<sup>+</sup>), activated endothelial microparticles  
374 (AEMP; <1 $\mu$ m, AnnexinV<sup>+</sup>/CD62E<sup>+</sup>), endothelial progenitor cell microparticles (EPCMP; <1 $\mu$ m,  
375 AnnexinV<sup>+</sup>/Flk<sup>+</sup>/Sca<sup>+</sup>), lung endothelial microparticles (LEMP; <1 $\mu$ m, AnnexinV<sup>+</sup>/Flk<sup>+</sup>/CD143<sup>+</sup>), and  
376 activated lung endothelial microparticles (ALEMP; <1 $\mu$ m, AnnexinV<sup>+</sup>/CD62E<sup>+</sup>/CD143<sup>+</sup>) in the  
377 plasma of benzene- or HEPA-filtered air-exposed mice were analyzed by flow cytometry (n=10/  
378 group). Values are mean  $\pm$  SEM. \*P<0.05 vs control mice.

379  
380 Figure 2: *Benzene metabolite trans,trans-mucondialdehyde (MA) increases endothelial*  
381 *microparticle formation from human aortic endothelial cells.* **A.** Caspase activation in human aortic  
382 endothelial cells (HAEC) incubated with benzene metabolites (hydroquinone - HQ, Catechol -  
383 Cat, and *t,t*-mucondialdehyde – MA; 10  $\mu$ M each, 18h). **B.** MA (10  $\mu$ M, 18h, n=6/group) - induced  
384 microparticle formation from HAEC. Values are mean  $\pm$  SEM. \*P<0.05 vs controls.

385  
386 Figure 3: *Benzene exposure depletes hematopoietic progenitor cells in the bone marrow.* Mice  
387 were exposed to benzene or HEPA-filtered air as described under *Methods* and the bone marrow  
388 derived stem cells were analyzed by flow cytometry (n=10/ group). Subpopulations of stem cells  
389 were identified based on expression of surface markers: Common Myeloid Progenitor Cells  
390 (CMPC; Lin<sup>-</sup>ckit<sup>+</sup>Sca<sup>-</sup>CD34<sup>+</sup>), Hematopoietic Progenitor Cells (HPC; Lin<sup>-</sup>ckit<sup>+</sup>Sca<sup>+</sup>CD34<sup>-</sup>) and  
391 Multipotent Progenitor Cells (MPC; Lin<sup>-</sup>ckit<sup>+</sup>Sca<sup>+</sup>CD34<sup>+</sup>). Panel **A** depicts the gating scheme for  
392 measuring hematopoietic stem cells. Panel **B** shows effects of benzene exposure on bone  
393 marrow stem cells. Values are mean  $\pm$  SEM. \*P<0.05 vs control mice.

394

395 Figure 4: *Benzene exposure augments platelet-leukocyte adduct formation*. Markers of platelet-  
396 leukocyte aggregates were analyzed in the peripheral blood of HEPA-filtered air and benzene-  
397 exposed mice by flow cytometry as described under *Methods*. **A**. Platelet-leukocyte adduct (n=10/  
398 group) formation assayed using FITC-labeled anti-CD-41(platelets) and APC-labeled anti-CD 45  
399 (leukocyte) antibodies. **B**. Platelet microparticle levels (< 1  $\mu$ m cells double positive for Annexin  
400 V and CD41). Values are mean  $\pm$  SEM. \*P<0.05 vs control mice.

401

402 Figure 5: *Benzene exposure enhances circulating lymphocytes*. Levels of lymphocytes were  
403 measured in the peripheral blood by flow cytometry as described under *Methods*. **A**. T-cells  
404 (CD3<sup>+</sup>, CD4<sup>+</sup>, and CD8<sup>+</sup>), **B**. B-cells (CD19<sup>+</sup>). **C**. natural killer (NK)-cells (NK1.1<sup>+</sup>). **D**. Granulocytes  
405 (GR1<sup>+</sup>). **E**. Monocytes (CD11b<sup>+</sup>). Ly6C<sup>-</sup> and Ly6C<sup>+</sup> subpopulations were measured by flow  
406 cytometry (n=10/ group). Values are mean  $\pm$  SEM. \*P<0.05 vs control mice.

407

408 Figure 6: *Benzene-induces differential gene regulation in the lung and the liver*. Mice were  
409 exposed to benzene or HEPA-filtered air as described under *Methods* and RNA-seq analysis was  
410 performed on lung and liver tissues (n=6/group). Panel **A** shows the differential regulation of  
411 genes in the liver and the lungs of benzene exposed mice. Panels **B** and **C** show the volcano plot  
412 of the differentially expressed genes, Panels **D** and **E** illustrate the heat map of prominent gene  
413 changes, and panels **F** and **G** depict the gene ontology (GO) analysis of differentially regulated  
414 mRNA in the lungs and the liver, respectively, of benzene-exposed mice.

415

416

417

418

419

420



## 421 References

- 422 1. Collaborators GBDRF. Global, regional, and national comparative risk assessment of 79  
423 behavioural, environmental and occupational, and metabolic risks or clusters of risks, 1990-2015:  
424 a systematic analysis for the Global Burden of Disease Study 2015. *Lancet*.  
425 2016;388(10053):1659-724. Epub 2016/10/14. doi: 10.1016/S0140-6736(16)31679-8. PubMed  
426 PMID: 27733284; PMCID: PMC5388856.
- 427 2. CDC. Toxicological Profile for Benzene. Agency for Toxic Substances and Disease  
428 Registry. 2007;CAS#: 71-43-2.
- 429 3. Smith MT. Advances in understanding benzene health effects and susceptibility. *Annu*  
430 *Rev Public Health*. 2010;31:133-48 2 p following 48. doi:  
431 10.1146/annurev.publhealth.012809.103646. PubMed PMID: 20070208; PMCID: PMC4360999.
- 432 4. Wong O, Fu H. Exposure to benzene and non-Hodgkin lymphoma, an epidemiologic  
433 overview and an ongoing case-control study in Shanghai. *Chem Biol Interact*. 2005;153-154:33-  
434 41. doi: 10.1016/j.cbi.2005.03.008. PubMed PMID: 15935798.
- 435 5. Jacob P, 3rd, Abu Raddaha AH, Dempsey D, Havel C, Peng M, Yu L, Benowitz NL.  
436 Comparison of nicotine and carcinogen exposure with water pipe and cigarette smoking. *Cancer*  
437 *Epidemiol Biomarkers Prev*. 2013;22(5):765-72. Epub 2013/03/07. doi: 10.1158/1055-9965.EPI-  
438 12-1422. PubMed PMID: 23462922; PMCID: PMC3650103.
- 439 6. Appel BR, Guirguis G, Kim IS, Garbin O, Fracchia M, Flessel CP, Kizer KW, Book SA,  
440 Warriner TE. Benzene, benzo(a)pyrene, and lead in smoke from tobacco products other than  
441 cigarettes. *Am J Public Health*. 1990;80(5):560-4. Epub 1990/05/01. doi: 10.2105/ajph.80.5.560.  
442 PubMed PMID: 2327532; PMCID: PMC1404640.
- 443 7. Clayton CA, Pellizzari ED, Whitmore RW, Perritt RL, Quackenboss JJ. National Human  
444 Exposure Assessment Survey (NHEXAS): distributions and associations of lead, arsenic and  
445 volatile organic compounds in EPA region 5. *J Expo Anal Environ Epidemiol*. 1999;9(5):381-92.  
446 Epub 1999/11/30. doi: 10.1038/sj.jea.7500055. PubMed PMID: 10554141.
- 447 8. Morello-Frosch RA, Woodruff TJ, Axelrad DA, Caldwell JC. Air toxics and health risks in  
448 California: the public health implications of outdoor concentrations. *Risk Anal*. 2000;20(2):273-91.  
449 Epub 2000/06/22. doi: 10.1111/0272-4332.202026. PubMed PMID: 10859786.
- 450 9. Fraser MP, Cass GR, Simoneit BRT. Gas-phase and particle-phase organic compounds  
451 emitted from motor vehicle traffic in a Los Angeles roadway tunnel. *Environ Sci Technol*.  
452 1998;32(14):2051-60. doi: DOI 10.1021/es970916e. PubMed PMID: WOS:000074839400004.
- 453 10. Lybarger JA, Lee R, Vogt DP, Perhac RM, Jr., Spengler RF, Brown DR. Medical costs  
454 and lost productivity from health conditions at volatile organic compound-contaminated superfund  
455 sites. *Environ Res*. 1998;79(1):9-19. Epub 1998/10/03. doi: 10.1006/enrs.1998.3845. PubMed  
456 PMID: 9756676.
- 457 11. Abplanalp W, DeJarnett N, Riggs DW, Conklin DJ, McCracken JP, Srivastava S, Xie Z,  
458 Rai S, Bhatnagar A, O'Toole TE. Benzene exposure is associated with cardiovascular disease  
459 risk. *PloS one*. 2017;12(9):e0183602. Epub 2017/09/09. doi: 10.1371/journal.pone.0183602.  
460 PubMed PMID: 28886060; PMCID: PMC5590846.
- 461 12. Abplanalp WT, Wickramasinghe NS, Sithu SD, Conklin DJ, Xie Z, Bhatnagar A, Srivastava  
462 S, O'Toole TE. Benzene Exposure Induces Insulin Resistance in Mice. *Toxicol Sci*.  
463 2019;167(2):426-37. Epub 2018/10/23. doi: 10.1093/toxsci/kfy252. PubMed PMID: 30346588;  
464 PMCID: PMC6358255.
- 465 13. Yeager R, Riggs DW, DeJarnett N, Srivastava S, Lorkiewicz P, Xie Z, Krivokhizhina T,  
466 Keith RJ, Srivastava S, Browning M, Zafar N, Krishnasamy S, DeFilippis A, Turner J, Rai SN,  
467 Bhatnagar A. Association between residential greenness and exposure to volatile organic  
468 compounds. *Sci Total Environ*. 2020;707:135435. Epub 2019/12/23. doi:  
469 10.1016/j.scitotenv.2019.135435. PubMed PMID: 31865083; PMCID: PMC7294698.

- 470 14. DeJarnett N, Yeager R, Conklin DJ, Lee J, O'Toole TE, McCracken J, Abplanalp W,  
471 Srivastava S, Riggs DW, Hamzeh I, Wagner S, Chugh A, DeFilippis A, Ciszewski T, Wyatt B,  
472 Becher C, Higdon D, Ramos KS, Tollerud DJ, Myers JA, Rai SN, Shah J, Zafar N, Krishnasamy  
473 SS, Prabhu SD, Bhatnagar A. Residential Proximity to Major Roadways Is Associated With  
474 Increased Levels of AC133+ Circulating Angiogenic Cells. *Arterioscler Thromb Vasc Biol.*  
475 2015;35(11):2468-77. Epub 2015/08/22. doi: 10.1161/ATVBAHA.115.305724. PubMed PMID:  
476 26293462; PMCID: PMC4862408.
- 477 15. Kotseva K, Popov T. Study of the cardiovascular effects of occupational exposure to  
478 organic solvents. *Int Arch Occup Environ Health.* 1998;71 Suppl:S87-91. Epub 1998/11/25.  
479 PubMed PMID: 9827890.
- 480 16. Wiwanitkit V. Benzene exposure and hypertension: an observation. *Cardiovasc J Afr.*  
481 2007;18(4):264-5. Epub 2007/10/18. PubMed PMID: 17940673.
- 482 17. Ran J, Qiu H, Sun S, Yang A, Tian L. Are ambient volatile organic compounds  
483 environmental stressors for heart failure? *Environ Pollut.* 2018;242(Pt B):1810-6. Epub  
484 2018/08/06. doi: 10.1016/j.envpol.2018.07.086. PubMed PMID: 30077408.
- 485 18. Tsai DH, Wang JL, Chuang KJ, Chan CC. Traffic-related air pollution and cardiovascular  
486 mortality in central Taiwan. *Sci Total Environ.* 2010;408(8):1818-23. Epub 2010/02/19. doi:  
487 10.1016/j.scitotenv.2010.01.044. PubMed PMID: 20163830.
- 488 19. Villeneuve PJ, Jerrett M, Su J, Burnett RT, Chen H, Brook J, Wheeler AJ, Cakmak S,  
489 Goldberg MS. A cohort study of intra-urban variations in volatile organic compounds and mortality,  
490 Toronto, Canada. *Environ Pollut.* 2013. Epub 2013/02/02. doi: 10.1016/j.envpol.2012.12.022.  
491 PubMed PMID: 23369806.
- 492 20. Blech W. [Alteration of the paper-chromatography determined arginase activity in liver,  
493 serum and peritoneal washing fluid in in vivo autolysis of a liver lobe of the rat]. *Z Gesamte Exp*  
494 *Med.* 1967;144(2):134-44. PubMed PMID: 5590846.
- 495 21. Philip A, Tsui A, O'Brien JE. Evaluation of API microtube GT system for detection of germ  
496 tube production by clinically significant yeasts. *J Clin Microbiol.* 1983;18(5):1280-1. doi:  
497 10.1128/JCM.18.5.1280-1281.1983. PubMed PMID: 6358255; PMCID: PMC272886.
- 498 22. Chen S, Zhou Y, Chen Y, Gu J. fastp: an ultra-fast all-in-one FASTQ preprocessor.  
499 *Bioinformatics.* 2018;34(17):i884-i90. doi: 10.1093/bioinformatics/bty560. PubMed PMID:  
500 30423086; PMCID: PMC6129281.
- 501 23. Dobin A, Davis CA, Schlesinger F, Drenkow J, Zaleski C, Jha S, Batut P, Chaisson M,  
502 Gingeras TR. STAR: ultrafast universal RNA-seq aligner. *Bioinformatics.* 2013;29(1):15-21. doi:  
503 10.1093/bioinformatics/bts635. PubMed PMID: 23104886; PMCID: PMC3530905.
- 504 24. Robinson MD, McCarthy DJ, Smyth GK. edgeR: a Bioconductor package for differential  
505 expression analysis of digital gene expression data. *Bioinformatics.* 2010;26(1):139-40. doi:  
506 10.1093/bioinformatics/btp616. PubMed PMID: 19910308; PMCID: PMC2796818.
- 507 25. Huang da W, Sherman BT, Lempicki RA. Systematic and integrative analysis of large  
508 gene lists using DAVID bioinformatics resources. *Nat Protoc.* 2009;4(1):44-57. doi:  
509 10.1038/nprot.2008.211. PubMed PMID: 19131956.
- 510 26. Bioinformatics. Calculate and draw custom Venn diagrams.  
511 <http://bioinformaticspsbugentbe/webtools/Venn/Bioinformatics> & Evolutionary Genomics.
- 512 27. Saeed AI, Sharov V, White J, Li J, Liang W, Bhagabati N, Braisted J, Klapa M, Carrier T,  
513 Thiagarajan M, Sturn A, Snuffin M, Rezantsev A, Popov D, Ryltsov A, Kostukovich E, Borisovsky  
514 I, Liu Z, Vinsavich A, Trush V, Quackenbush J. TM4: a free, open-source system for microarray  
515 data management and analysis. *Biotechniques.* 2003;34(2):374-8. doi: 10.2144/03342mt01.  
516 PubMed PMID: 12613259.
- 517 28. Malovichko MV, Zeller I, Krivokhizhina TV, Xie Z, Lorkiewicz P, Agarwal A,  
518 Wickramasinghe N, Sithu SD, Shah J, O'Toole T, Rai SN, Bhatnagar A, Conklin DJ, Srivastava  
519 S. Systemic Toxicity of Smokeless Tobacco Products in Mice. *Nicotine Tob Res.* 2019;21(1):101-  
520 10. doi: 10.1093/ntr/ntx230. PubMed PMID: 30085294; PMCID: PMC6329408.

- 521 29. Pope CA, 3rd, Bhatnagar A, McCracken JP, Abplanalp W, Conklin DJ, O'Toole T.  
522 Exposure to Fine Particulate Air Pollution Is Associated With Endothelial Injury and Systemic  
523 Inflammation. *Circ Res.* 2016;119(11):1204-14. doi: 10.1161/CIRCRESAHA.116.309279.  
524 PubMed PMID: 27780829; PMCID: PMC5215745.
- 525 30. Sutaria SR, Nantz MH. A Convenient Preparation of Muconaldehyde Using a One-Pot  
526 Acid-to-Aldehyde Reduction Protocol. *Org Prep Proced Int.* 2021;53:In Press.
- 527 31. Conklin DJ, Malovichko MV, Zeller I, Das TP, Krivokhizhina TV, Lynch BH, Lorkiewicz P,  
528 Agarwal A, Wickramasinghe N, Habertzettl P, Sithu SD, Shah J, O'Toole TE, Rai SN, Bhatnagar  
529 A, Srivastava S. Biomarkers of Chronic Acrolein Inhalation Exposure in Mice: Implications for  
530 Tobacco Product-Induced Toxicity. *Toxicol Sci.* 2017;158(2):263-74. doi: 10.1093/toxsci/kfx095.  
531 PubMed PMID: 28482051; PMCID: PMC5837482.
- 532 32. Heiss C, Amabile N, Lee AC, Real WM, Schick SF, Lao D, Wong ML, Jahn S, Angeli FS,  
533 Minasi P, Springer ML, Hammond SK, Glantz SA, Grossman W, Balmes JR, Yeghiazarians Y.  
534 Brief secondhand smoke exposure depresses endothelial progenitor cells activity and endothelial  
535 function: sustained vascular injury and blunted nitric oxide production. *J Am Coll Cardiol.*  
536 2008;51(18):1760-71. doi: 10.1016/j.jacc.2008.01.040. PubMed PMID: 18452782.
- 537 33. Chang EI, Loh SA, Ceradini DJ, Chang EI, Lin SE, Bastidas N, Aarabi S, Chan DA,  
538 Freedman ML, Giaccia AJ, Gurtner GC. Age decreases endothelial progenitor cell recruitment  
539 through decreases in hypoxia-inducible factor 1alpha stabilization during ischemia. *Circulation.*  
540 2007;116(24):2818-29. doi: 10.1161/CIRCULATIONAHA.107.715847. PubMed PMID:  
541 18040029.
- 542 34. Rauscher FM, Goldschmidt-Clermont PJ, Davis BH, Wang T, Gregg D, Ramaswami P,  
543 Phippen AM, Annex BH, Dong C, Taylor DA. Aging, progenitor cell exhaustion, and  
544 atherosclerosis. *Circulation.* 2003;108(4):457-63. doi: 10.1161/01.CIR.0000082924.75945.48.  
545 PubMed PMID: 12860902.
- 546 35. Vasa M, Fichtlscherer S, Aicher A, Adler K, Urbich C, Martin H, Zeiher AM, Dimmeler S.  
547 Number and migratory activity of circulating endothelial progenitor cells inversely correlate with  
548 risk factors for coronary artery disease. *Circ Res.* 2001;89(1):E1-7. PubMed PMID: 11440984.
- 549 36. Werner N, Wassmann S, Ahlers P, Kosiol S, Nickenig G. Circulating CD31+/annexin V+  
550 apoptotic microparticles correlate with coronary endothelial function in patients with coronary  
551 artery disease. *Arterioscler Thromb Vasc Biol.* 2006;26(1):112-6. doi:  
552 10.1161/01.ATV.0000191634.13057.15. PubMed PMID: 16239600.
- 553 37. Koga H, Sugiyama S, Kugiyama K, Watanabe K, Fukushima H, Tanaka T, Sakamoto T,  
554 Yoshimura M, Jinnouchi H, Ogawa H. Elevated levels of VE-cadherin-positive endothelial  
555 microparticles in patients with type 2 diabetes mellitus and coronary artery disease. *J Am Coll*  
556 *Cardiol.* 2005;45(10):1622-30. Epub 2005/05/17. doi: 10.1016/j.jacc.2005.02.047. PubMed PMID:  
557 15893178.
- 558 38. Simak J, Gelderman MP, Yu H, Wright V, Baird AE. Circulating endothelial microparticles  
559 in acute ischemic stroke: a link to severity, lesion volume and outcome. *J Thromb Haemost.*  
560 2006;4(6):1296-302. Epub 2006/05/19. doi: 10.1111/j.1538-7836.2006.01911.x. PubMed PMID:  
561 16706974.
- 562 39. McHale CM, Zhang L, Smith MT. Current understanding of the mechanism of benzene-  
563 induced leukemia in humans: implications for risk assessment. *Carcinogenesis.* 2012;33(2):240-  
564 52. Epub 2011/12/15. doi: 10.1093/carcin/bgr297. PubMed PMID: 22166497; PMCID:  
565 PMC3271273.
- 566 40. Lan Q, Zhang L, Shen M, Smith MT, Li G, Vermeulen R, Rappaport SM, Forrest MS,  
567 Hayes RB, Linet M, Dosemeci M, Alter BP, Weinberg RS, Yin S, Yeager M, Welch R,  
568 Waidyanatha S, Kim S, Chanock S, Rothman N. Polymorphisms in cytokine and cellular adhesion  
569 molecule genes and susceptibility to hematotoxicity among workers exposed to benzene. *Cancer*  
570 *Res.* 2005;65(20):9574-81. doi: 10.1158/0008-5472.CAN-05-1419. PubMed PMID: 16230423.

- 571 41. Poredos P, Orehek M, Tratnik E. Smoking is associated with dose-related increase of  
572 intima-media thickness and endothelial dysfunction. *Angiology*. 1999;50(3):201-8. PubMed PMID:  
573 10088799.
- 574 42. Lind L, Berglund L, Larsson A, Sundstrom J. Endothelial function in resistance and conduit  
575 arteries and 5-year risk of cardiovascular disease. *Circulation*. 2011;123(14):1545-51. doi:  
576 10.1161/CIRCULATIONAHA.110.984047. PubMed PMID: 21444885.
- 577 43. Gokce N. Clinical assessment of endothelial function: ready for prime time? *Circ*  
578 *Cardiovasc Imaging*. 2011;4(4):348-50. doi: 10.1161/CIRCIMAGING.111.966218. PubMed  
579 PMID: 21772010; PMCID: PMC3144162.
- 580 44. Mause SF, Weber C. Microparticles: protagonists of a novel communication network for  
581 intercellular information exchange. *Circ Res*. 2010;107(9):1047-57. doi:  
582 10.1161/CIRCRESAHA.110.226456. PubMed PMID: 21030722.
- 583 45. Philippova M, Suter Y, Toggweiler S, Schoenenberger AW, Joshi MB, Kyriakakis E, Erne  
584 P, Resink TJ. T-cadherin is present on endothelial microparticles and is elevated in plasma in  
585 early atherosclerosis. *Eur Heart J*. 2011;32(6):760-71. doi: 10.1093/eurheartj/ehq206. PubMed  
586 PMID: 20584775.
- 587 46. Pirro M, Schillaci G, Bagaglia F, Menecali C, Paltriccina R, Mannarino MR, Capanni M,  
588 Velardi A, Mannarino E. Microparticles derived from endothelial progenitor cells in patients at  
589 different cardiovascular risk. *Atherosclerosis*. 2008;197(2):757-67. doi:  
590 10.1016/j.atherosclerosis.2007.07.012. PubMed PMID: 17720166.
- 591 47. Amabile N, Guerin AP, Leroyer A, Mallat Z, Nguyen C, Boddaert J, London GM, Tedgui  
592 A, Boulanger CM. Circulating endothelial microparticles are associated with vascular dysfunction  
593 in patients with end-stage renal failure. *J Am Soc Nephrol*. 2005;16(11):3381-8. Epub 2005/09/30.  
594 doi: 10.1681/ASN.2005050535. PubMed PMID: 16192427.
- 595 48. Esposito K, Ciotola M, Schisano B, Gualdiero R, Sardelli L, Misso L, Giannetti G, Giugliano  
596 D. Endothelial microparticles correlate with endothelial dysfunction in obese women. *J Clin*  
597 *Endocrinol Metab*. 2006;91(9):3676-9. Epub 2006/07/11. doi: 10.1210/jc.2006-0851. PubMed  
598 PMID: 16822816.
- 599 49. Lee ST, Chu K, Jung KH, Kim JM, Moon HJ, Bahn JJ, Im WS, Sunwoo J, Moon J, Kim M,  
600 Lee SK, Roh JK. Circulating CD62E+ microparticles and cardiovascular outcomes. *PLoS One*.  
601 2012;7(4):e35713. Epub 2012/05/09. doi: 10.1371/journal.pone.0035713. PubMed PMID:  
602 22563392; PMCID: PMC3338519.
- 603 50. Gordon C, Gudi K, Krause A, Sackrowitz R, Harvey BG, Strulovici-Barel Y, Mezey JG,  
604 Crystal RG. Circulating endothelial microparticles as a measure of early lung destruction in  
605 cigarette smokers. *Am J Respir Crit Care Med*. 2011;184(2):224-32. doi: 10.1164/rccm.201012-  
606 2061OC. PubMed PMID: 21471087; PMCID: PMC3172886.
- 607 51. Jy W, Jimenez JJ, Mauro LM, Horstman LL, Cheng P, Ann ER, Bidot CJ, Ahn YS.  
608 Endothelial microparticles induce formation of platelet aggregates via a von Willebrand  
609 factor/ristocetin dependent pathway, rendering them resistant to dissociation. *Journal of*  
610 *Thrombosis and Haemostasis*. 2005;3(6):1301-8. doi: DOI 10.1111/j.1538-7836.2005.01384.x.  
611 PubMed PMID: WOS:000229873700031.
- 612 52. Jimenez JJ, Jy W, Mauro LM, Horstman LL, Soderland C, Ahn YS. Endothelial  
613 microparticles released in thrombotic thrombocytopenic purpura express von Willebrand factor  
614 and markers of endothelial activation. *Brit J Haematol*. 2003;123(5):896-902. doi: DOI  
615 10.1046/j.1365-2141.2003.04716.x. PubMed PMID: WOS:000186695700015.
- 616 53. Li QX, Ke N, Sundaram R, Wong-Staal F. NR4A1, 2, 3--an orphan nuclear hormone  
617 receptor family involved in cell apoptosis and carcinogenesis. *Histol Histopathol*. 2006;21(5):533-  
618 40. Epub 2006/02/24. doi: 10.14670/HH-21.533. PubMed PMID: 16493583.
- 619 54. Pei L, Castrillo A, Tontonoz P. Regulation of macrophage inflammatory gene expression  
620 by the orphan nuclear receptor Nur77. *Mol Endocrinol*. 2006;20(4):786-94. Epub 2005/12/13. doi:  
621 10.1210/me.2005-0331. PubMed PMID: 16339277.

- 622 55. Hanna RN, Shaked I, Hubbeling HG, Punt JA, Wu R, Herrley E, Zaugg C, Pei H,  
623 Geissmann F, Ley K, Hedrick CC. NR4A1 (Nur77) deletion polarizes macrophages toward an  
624 inflammatory phenotype and increases atherosclerosis. *Circ Res.* 2012;110(3):416-27. Epub  
625 2011/12/24. doi: 10.1161/CIRCRESAHA.111.253377. PubMed PMID: 22194622; PMCID:  
626 PMC3309661.
- 627 56. Zhao Y, Bruemmer D. NR4A orphan nuclear receptors: transcriptional regulators of gene  
628 expression in metabolism and vascular biology. *Arterioscler Thromb Vasc Biol.* 2010;30(8):1535-  
629 41. Epub 2010/07/16. doi: 10.1161/ATVBAHA.109.191163. PubMed PMID: 20631354; PMCID:  
630 PMC2907171.
- 631 57. Li P, Bai Y, Zhao X, Tian T, Tang L, Ru J, An Y, Wang J. NR4A1 contributes to high-fat  
632 associated endothelial dysfunction by promoting CaMKII-Parkin-mitophagy pathways. *Cell Stress*  
633 *Chaperones.* 2018;23(4):749-61. Epub 2018/02/23. doi: 10.1007/s12192-018-0886-1. PubMed  
634 PMID: 29470798; PMCID: PMC6045535.
- 635 58. Hilgendorf I, Gerhardt LM, Tan TC, Winter C, Holderried TA, Chousterman BG, Iwamoto  
636 Y, Liao R, Zirlik A, Scherer-Crosbie M, Hedrick CC, Libby P, Nahrendorf M, Weissleder R, Swirski  
637 FK. Ly-6Chigh monocytes depend on Nr4a1 to balance both inflammatory and reparative phases  
638 in the infarcted myocardium. *Circ Res.* 2014;114(10):1611-22. Epub 2014/03/15. doi:  
639 10.1161/CIRCRESAHA.114.303204. PubMed PMID: 24625784; PMCID: PMC4017349.
- 640 59. Martinez-Gonzalez J, Badimon L. The NR4A subfamily of nuclear receptors: new early  
641 genes regulated by growth factors in vascular cells. *Cardiovasc Res.* 2005;65(3):609-18. Epub  
642 2005/01/25. doi: 10.1016/j.cardiores.2004.10.002. PubMed PMID: 15664387.
- 643 60. You B, Jiang YY, Chen S, Yan G, Sun J. The orphan nuclear receptor Nur77 suppresses  
644 endothelial cell activation through induction of IkappaBalpha expression. *Circ Res.*  
645 2009;104(6):742-9. Epub 2009/02/14. doi: 10.1161/CIRCRESAHA.108.192286. PubMed PMID:  
646 19213954.
- 647 61. Hultgren NW, Fang JS, Ziegler ME, Ramirez RN, Phan DTT, Hatch MMS, Welch-Reardon  
648 KM, Paniagua AE, Kim LS, Shon NN, Williams DS, Mortazavi A, Hughes CCW. Slug regulates  
649 the Dll4-Notch-VEGFR2 axis to control endothelial cell activation and angiogenesis. *Nat*  
650 *Commun.* 2020;11(1):5400. Epub 2020/10/28. doi: 10.1038/s41467-020-18633-z. PubMed PMID:  
651 33106502; PMCID: PMC7588439.
- 652 62. Evrard SM, Lecce L, Michelis KC, Nomura-Kitabayashi A, Pandey G, Purushothaman KR,  
653 d'Escamard V, Li JR, Hadri L, Fujitani K, Moreno PR, Benard L, Rimmele P, Cohain A, Mecham  
654 B, Randolph GJ, Nabel EG, Hajjar R, Fuster V, Boehm M, Kovacic JC. Endothelial to  
655 mesenchymal transition is common in atherosclerotic lesions and is associated with plaque  
656 instability. *Nat Commun.* 2016;7:11853. Epub 2016/06/25. doi: 10.1038/ncomms11853. PubMed  
657 PMID: 27340017; PMCID: PMC4931033.

658

659

660

661

662

663

664

665

666

667 **Highlights**

- 668 • Inhaled benzene exposure increases the levels of blood endothelial microparticles.
- 669 • *In vitro*, benzene metabolite *trans, trans*-mucondialdehyde induces endothelial cell
- 670 apoptosis and microparticles formation.
- 671 • Inhaled benzene exposure decreases the levels of hematopoietic progenitor cells in the
- 672 bone marrow.
- 673 • Inhaled benzene exposure augments the circulating levels of platelet-leukocyte adducts.
- 674
- 675

Fig. 1

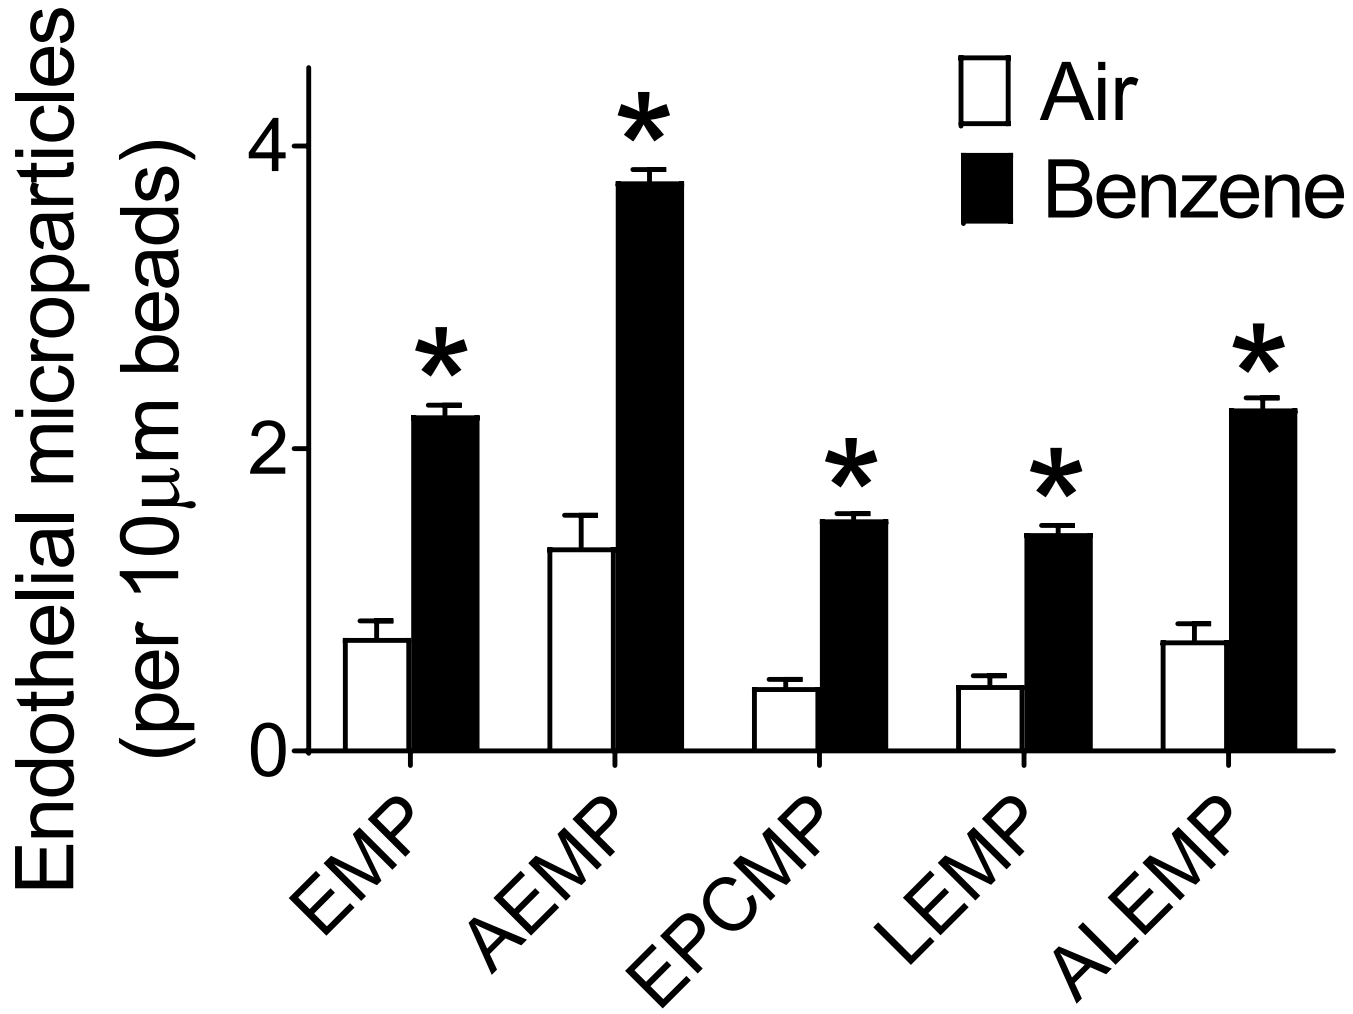

Fig. 2

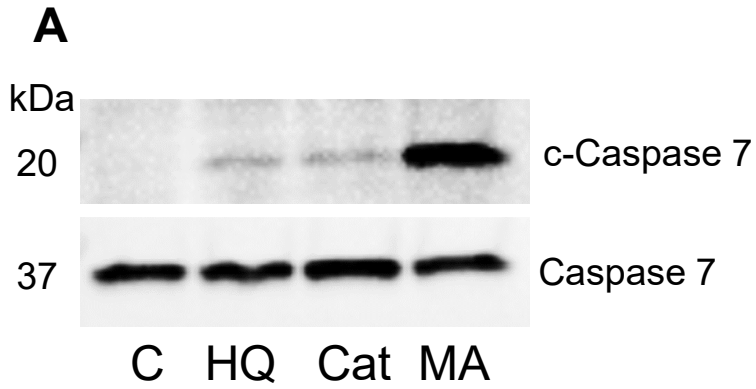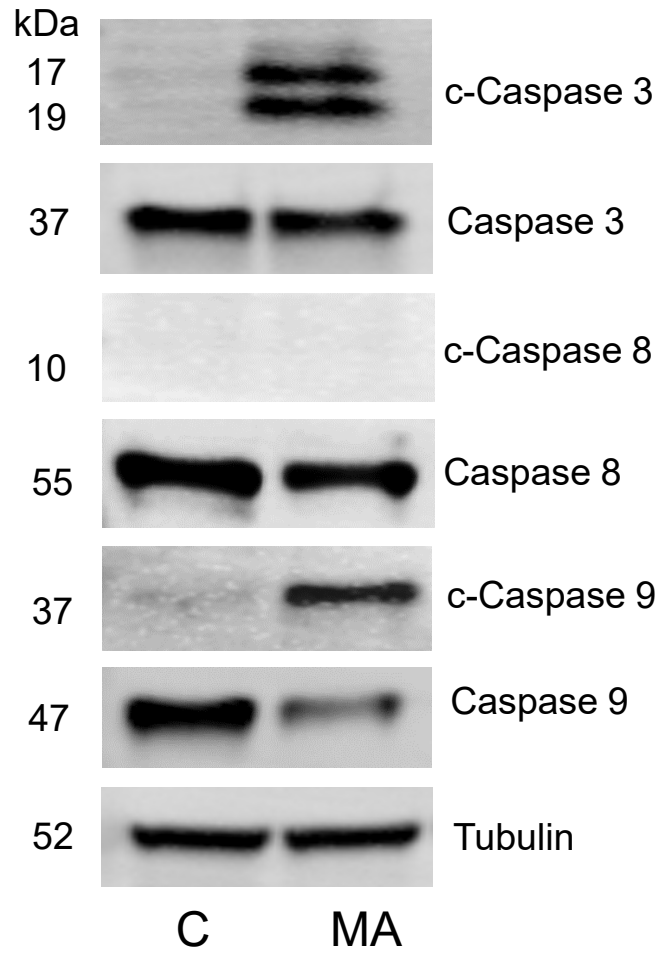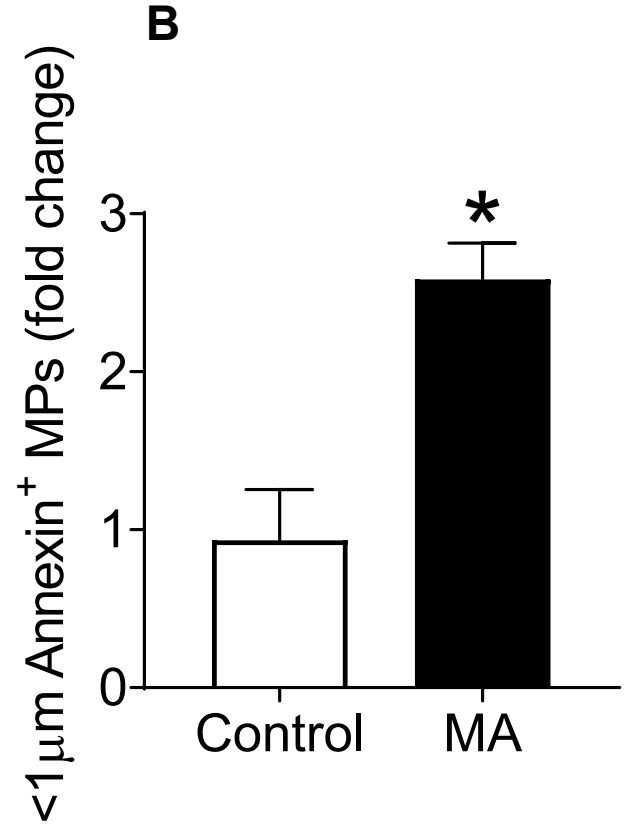



**A**

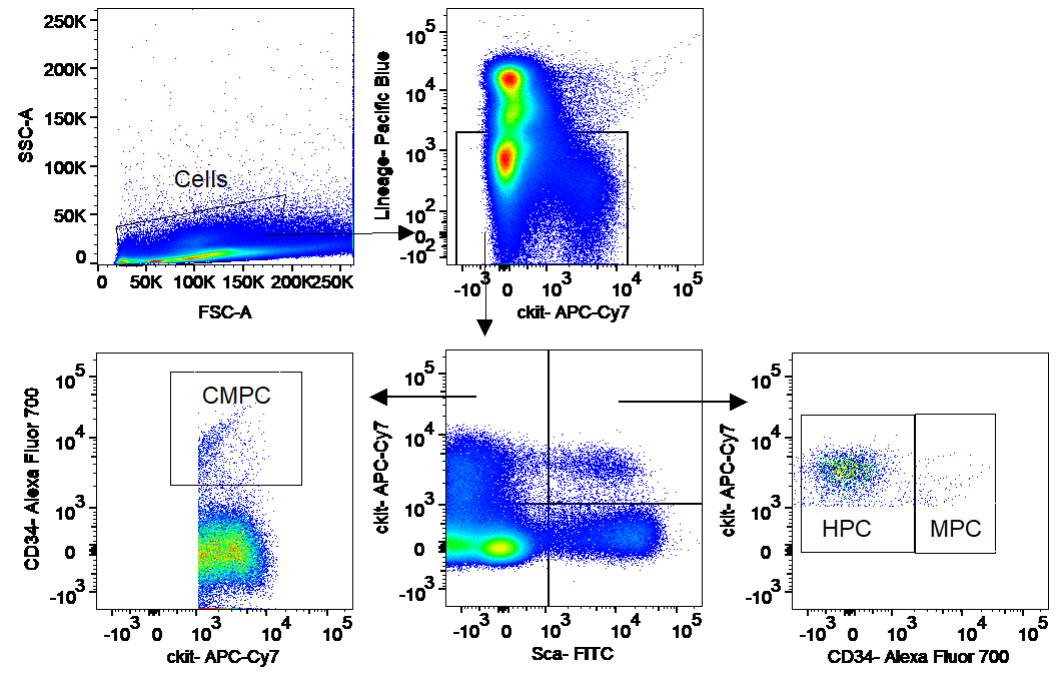

**B**

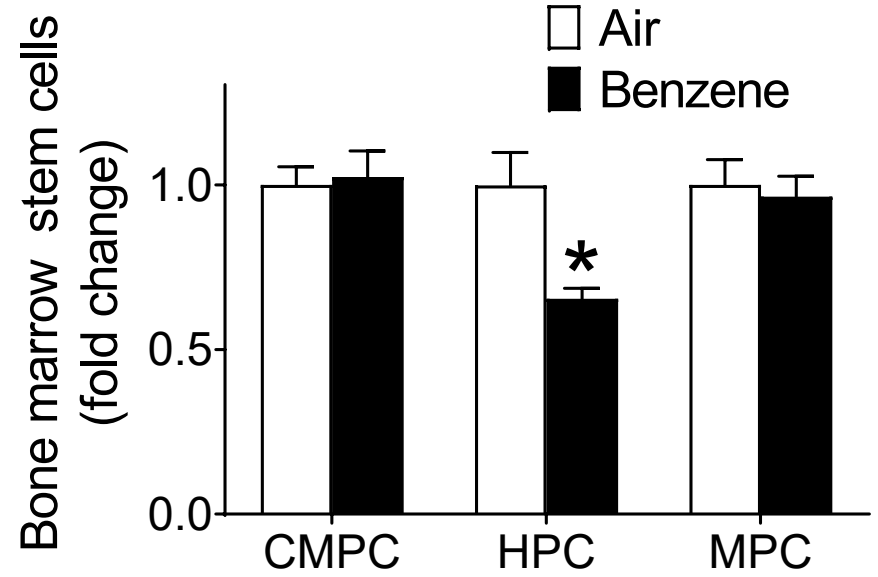

Fig. 4

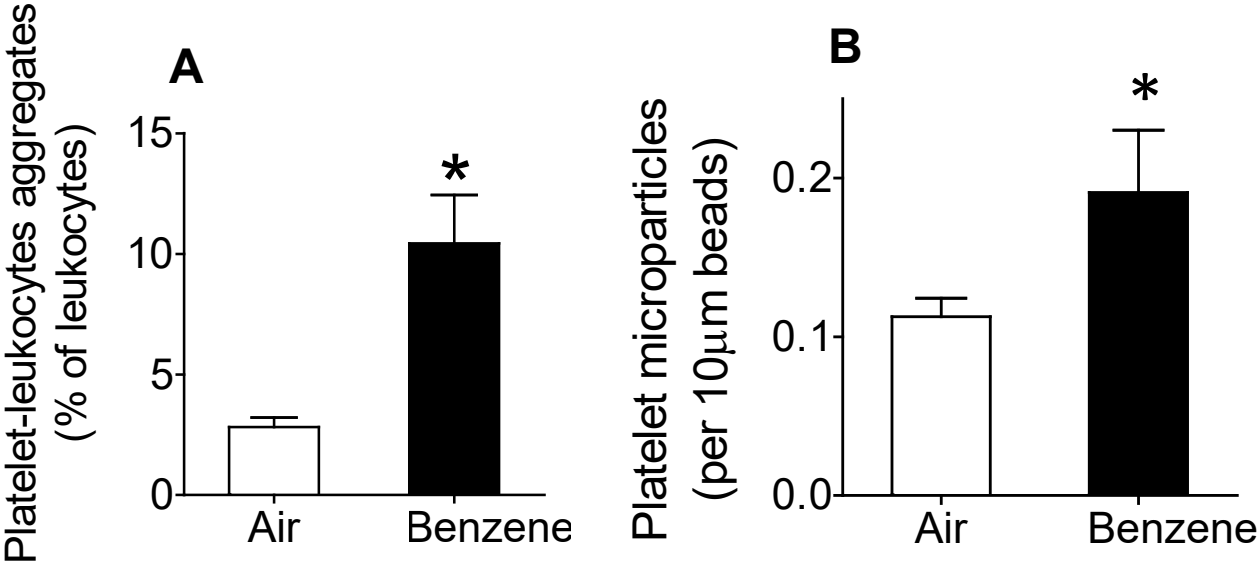

Fig. 5

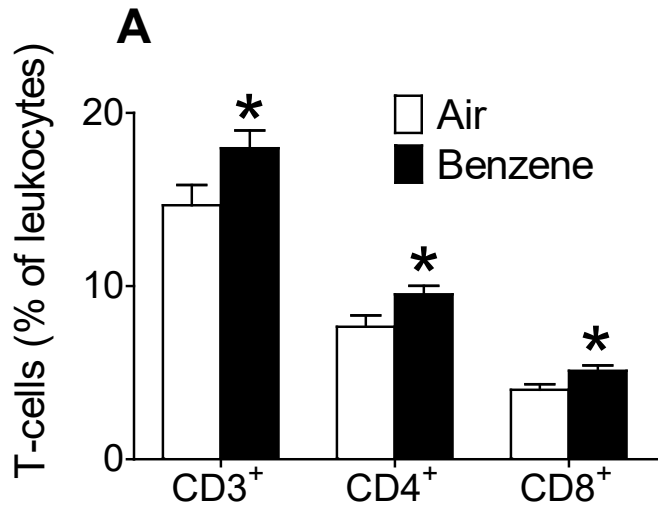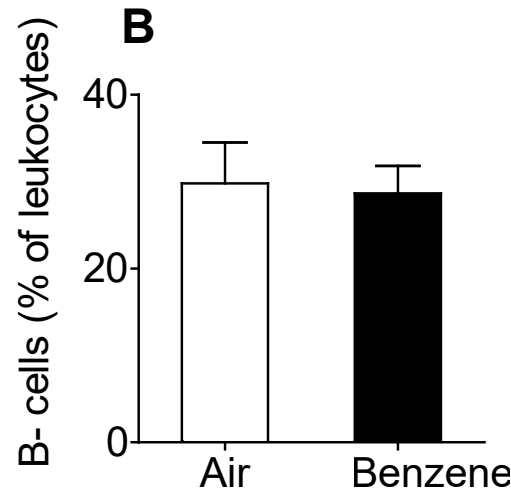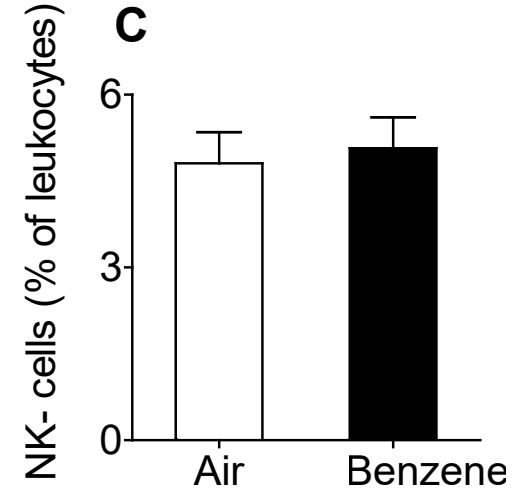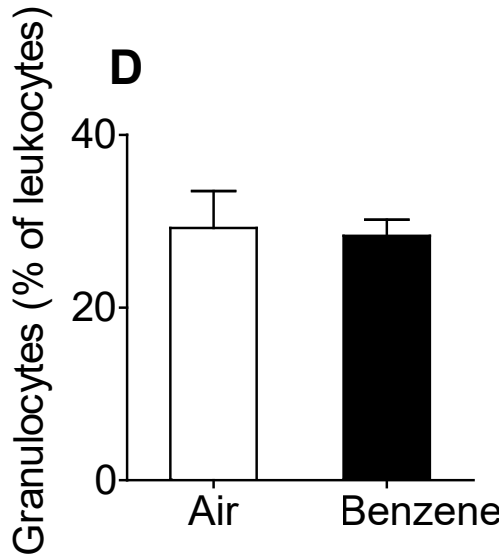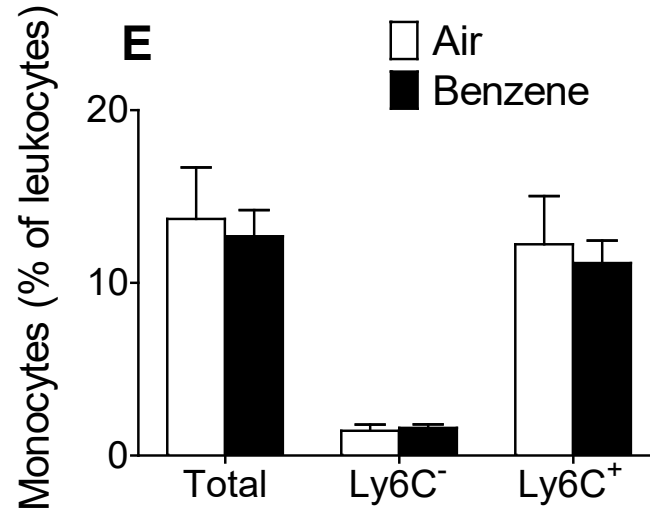

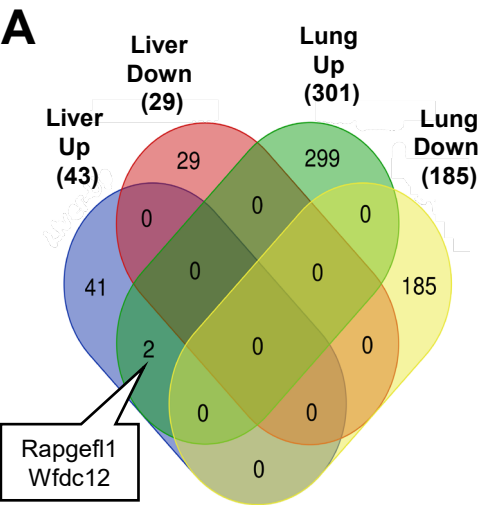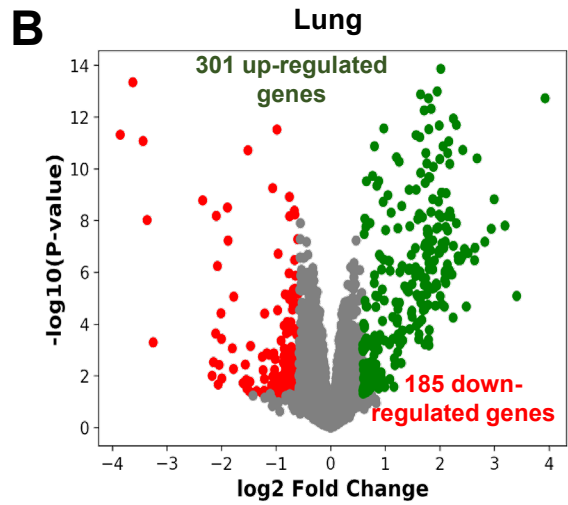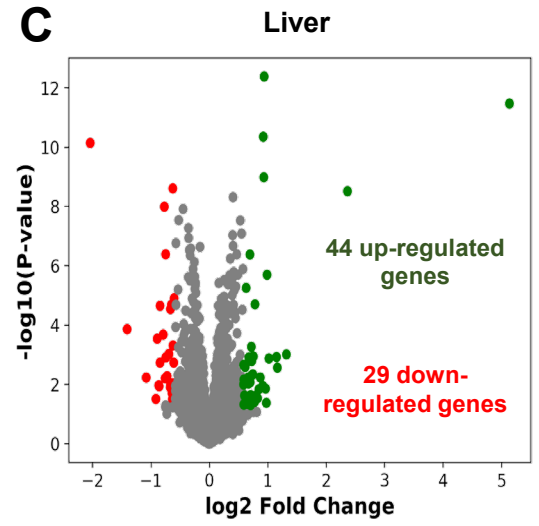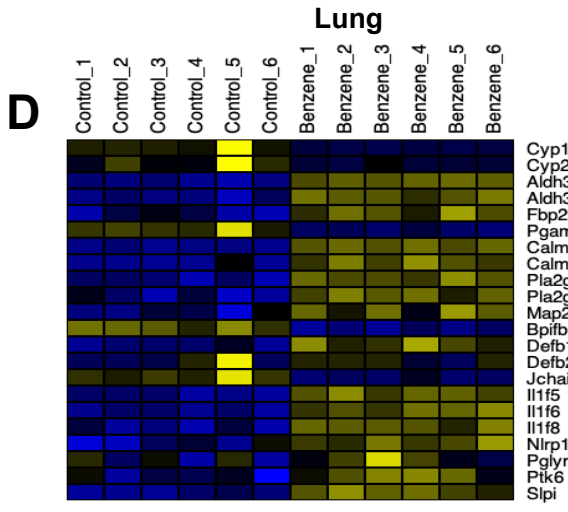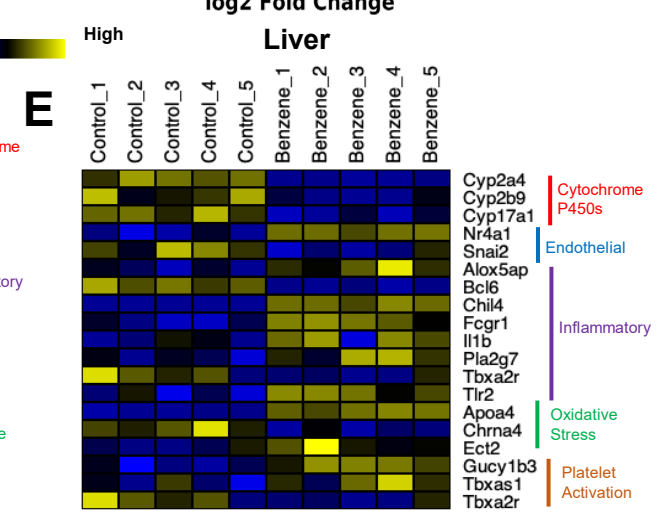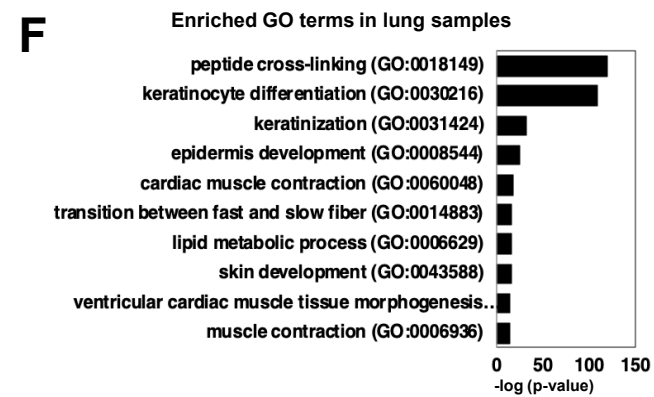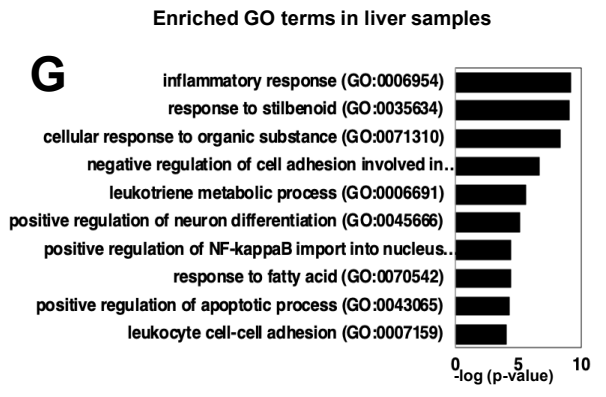

Supplemental table1: *Plasma parameters in benzene-exposed mice*

| Parameters (pg/mL)          | Air       | Benzene   | Air + LPS  | Benzene + LPS         |
|-----------------------------|-----------|-----------|------------|-----------------------|
| <b>Adhesion molecules</b>   |           |           |            |                       |
| sE-Selectin                 | 643±59    | 610±66    | 2154±161   | 2131±204              |
| sP-Selectin                 | 1732±254  | 1390±119  | 2427±336   | 2217±328              |
| sICAM-1                     | 128±6     | 109±6*    | 476±25     | 466±23                |
| Pecam-1                     | 37±3      | 30±2      | 48±3       | 41±3                  |
| <b>Angiogenesis markers</b> |           |           |            |                       |
| Angiopoietin-2              | 4732±342  | 4872±243  |            |                       |
| EGF                         | 156±89    | 513±339   |            |                       |
| FGF-2                       | ND        | ND        |            |                       |
| HGF                         | 327±74    | 232±26    |            |                       |
| Leptin                      | 608±126   | 801±222   |            |                       |
| PLGF-2                      | 3.3±0.7   | 3.2±0.4   |            |                       |
| SDF-1                       | ND        | ND        |            |                       |
| VEGF                        | 1.02±0.1  | 1.12±0.05 |            |                       |
| <b>Cytokines</b>            |           |           |            |                       |
| GM-CSF                      | 2±1       | 14±8      | 9±2        | 8±1                   |
| IFN $\gamma$                | 1.3±0.4   | 2.3±0.5   | 1.8±0.3    | 1.6±0.4               |
| IL-1 $\alpha$               | 8±3       | 3±1       | 14±4       | 6±2                   |
| IL-1 $\beta$                | ND        | ND        | ND         | ND                    |
| IL-2                        | 13±6      | 17±11     | 15±8       | 5±1                   |
| IL-4                        | 0.19±0.11 | 0.04±0.01 | 0.19±0.04  | 0.16±0.04             |
| IL-5                        | 6±1       | 5±1       | 13±3       | 9±1                   |
| IL-6                        | 22±8      | 4±1*      | 293±54     | 354±80                |
| IL-7                        | 22±9      | 9±5       | 11±5       | 23±9                  |
| IL-10                       | 3.7±0.4   | 3.4±0.4   | 583.5±39.6 | 447±45.5 <sup>#</sup> |
| IL-12                       | 6±2       | 6±1       | 17±5       | 11±2                  |
| IL-13                       | 10±2      | 9±2       | 12±1       | 18±4                  |
| LIX                         | 130±61    | 166±72    | 165±41     | 222±43                |
| IL-17A                      | 6±2       | 5±1       | 4±1        | 6±1                   |
| KC                          | 406±153   | 178±34    | 3048±443   | 2675±503              |
| MCP-1                       | 14±3      | 31±22     | 593±133    | 481±56                |
| MIP-2                       | 75±14     | 53±8      | 192±25     | 210±51                |
